# Supplementary material for: Glacial lake inventory of high-mountain Asia in 1990 and 2018 derived from Landsat images
Source: Copernicus journal article supplement (doi:10.5194/essd-12-2169-2020), 2020-09-13
Supplement: Supplementary file 1 [file essd-12-2169-2020-supplement.zip]

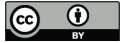

## *Supplement of*

# **Glacial lake inventory of high-mountain Asia in 1990 and 2018 derived from Landsat images**

**Xin Wang et al.**

*Correspondence to:* Xin Wang ([xinwang\\_hn@163.com](mailto:xinwang_hn@163.com))

- [essd-12-2169-2020-supplement-title-page.pdf](#)
- [Supplementary Table S1.xlsx](#)

The copyright of individual parts of the supplement might differ from the CC BY 4.0 License.
